1                   **Vagal nerve stimulation triggers widespread responses and**  
2                   **alters large-scale functional connectivity in the rat brain**

3  
4                   Jiayue Cao<sup>1,4</sup>, Kun-Han Lu<sup>2,4</sup>, Terry L. Powley<sup>1,3,4</sup>, and Zhongming Liu<sup>1,2,4\*</sup>

5  
6                   <sup>1</sup>Weldon School of Biomedical Engineering, Purdue University, West Lafayette, Indiana, United States

7                   <sup>2</sup>School of Electrical and Computer Engineering, Purdue University, West Lafayette, Indiana, United  
8                   States

9                   <sup>3</sup>Department of Psychological Science, Purdue University, West Lafayette, Indiana, United States

10                  <sup>4</sup>Purdue Institute of Integrative Neuroscience, Purdue University, West Lafayette, Indiana, United States

11  
12                  \* Corresponding author

13                  Email: [zmliu@purdue.edu](mailto:zmliu@purdue.edu) (ZL)

14

## 15 **Abstract**

16 Vagus nerve stimulation (VNS) is a therapy for epilepsy and depression. However, its efficacy varies and  
17 its mechanism remains unclear. Prior studies have used functional magnetic resonance imaging (fMRI) to  
18 map brain activations with VNS in human brains, but have reported inconsistent findings. The source of  
19 inconsistency is likely attributable to the complex temporal characteristics of VNS-evoked fMRI responses  
20 that cannot be fully explained by simplified response models in the conventional model-based analysis for  
21 activation mapping. To address this issue, we acquired 7-Tesla blood oxygenation level dependent fMRI  
22 data from anesthetized Sprague–Dawley rats receiving electrical stimulation at the left cervical vagus nerve.  
23 Using spatially independent component analysis, we identified 20 functional brain networks and detected  
24 the network-wise activations with VNS in a data-driven manner. Our results showed that VNS activated 15  
25 out of 20 brain networks, and the activated regions covered >76% of the brain volume. The time course of  
26 the evoked response was complex and distinct across regions and networks. In addition, VNS altered the  
27 strengths and patterns of correlations among brain networks relative to those in the resting state. The most  
28 notable changes in network-network interactions were related to the limbic system. Together, such profound  
29 and widespread effects of VNS may underlie its unique potential for a wide range of therapeutics to relieve  
30 central or peripheral conditions.

31

## 32 **Introduction**

33           Since the 1800s (1, 2), vagus nerve stimulation (VNS) has been studied as a potential way to treat  
34 various diseases, including epilepsy, depression, tinnitus, Alzheimer’s Disease, and obesity (3-8). The  
35 therapeutic benefits apparently depend on the effects of VNS on the central neural system (CNS) mediated  
36 through neuroelectrical or neurochemical signaling (9). Studies have been conducted to evaluate the CNS  
37 responses to VNS with neural imaging or recording techniques. For example, invasive recordings of unit  
38 activity or field potentials have shown VNS-evoked neuronal responses in the nucleus of solitary tract (10),  
39 the locus coeruleus (11), and the hippocampus (12). These techniques offer high neuronal specificity but  
40 only cover spatially confined targets. In contrast, electroencephalogram (EEG) has been used to reveal  
41 VNS-induced synchronization or desynchronization of neural oscillations in the macroscopic scale (13, 14),  
42 while being severely limited by its spatial resolution and specificity as well as its inability to detect activities  
43 from deep brain structures. However, sub-cortical regions are of interest for VNS, because the vagus nerves  
44 convey signals to the brain through polysynaptic neural pathways by first projecting to the brainstem, then  
45 subcortical areas, and lastly the cortex (9, 15).

46           Complementary to conventional electrophysiological approaches, functional neuroimaging allows  
47 characterizing the effects of VNS throughout the brain volume. Using positron emission tomography (PET)  
48 or single-photon emission computerized tomography (SPECT), prior studies have reported VNS-evoked  
49 responses in the thalamus, hippocampus, amygdala, inferior cerebellum, and cingulate cortex (16-19); but  
50 these techniques are unable to capture the dynamics of the responses due to their poor temporal resolution.  
51 In this regard, functional magnetic resonance imaging (fMRI) is more favorable because it offers balanced  
52 and higher spatial and temporal resolution. Previous human VNS-fMRI studies have reported VNS-evoked  
53 blood oxygenation level dependent (BOLD) responses in the thalamus, hypothalamus, prefrontal cortex,  
54 amygdala, and hippocampal formation (20-24). However, the reported activation patterns are not always  
55 consistent (25), sometimes highlighting activations in different regions or even opposite responses in the  
56 same regions (20, 22). What underlies this inconsistency might explain the varying efficacy of VNS in

57 treatment of individual patients, or might be attributed to the analysis methods for activation mapping (25).  
58 Therefore, it is desirable to explore and evaluate various methodological choices in the fMRI data analysis,  
59 in order to properly interpret the VNS evoked activations for understanding the implications of VNS to  
60 neurological disorders.

61 Functional MRI not only localizes the CNS responses of VNS (25), it also reveals the patterns and  
62 dynamics of functional networks during VNS, which helps to characterize the network basis of VNS-based  
63 therapeutics. Findings from prior studies have shown that the therapeutic or behavioral effects of VNS may  
64 be compromised, when the underlying neuronal circuit is disrupted in terms of its critical node or receptor.  
65 For example, given a lesion in the locus coeruleus, VNS fails to suppress epilepsy (26); given a blockade  
66 of the muscarinic receptor, VNS fails to promote perceptual learning (27). However, how VNS affects the  
67 patterns of interactions among regions or networks (or functional connectivity) has rarely been addressed  
68 (28), even though fMRI has become the primary tool for studying functional connectivity (29, 30).

69 In this study, we aimed to address the BOLD effects of VNS in the rat brain. The use of a rat model  
70 mitigated the inter-subject variation in genetics, gender, age, weight, and health conditions. It provided a  
71 well-controlled setting for us to compare different analysis methods for mapping the activations with VNS.  
72 Specifically, we used the independent component analysis (ICA) to identify brain networks, and then used  
73 a data-driven analysis to detect the VNS-evoked activation separately for each network, as opposed to each  
74 voxel or region. In addition to the activation mapping, we also evaluated the effects of VNS on network-  
75 network interactions, against the baseline of intrinsic interactions in the resting state. As such, we attempted  
76 to address the effects of VNS on the brain from the perspectives of both regional activity and inter-regional  
77 functional connectivity.

## 78 **Methods and Materials**

### 79 *Subjects*

80 A total of 17 Sprague–Dawley rats (male, weight: 250-350g; Envigo RMS, Indianapolis, IN) were  
81 studied according to a protocol approved by the Purdue Animal Care and Use Committee (PACUC) and  
82 the Laboratory Animal Program (LAP). Of the 17 animals, seven animals were used for VNS-fMRI  
83 experiments; ten animals were used for resting state fMRI. All animals were housed in a strictly controlled  
84 environment (temperature  $21\pm 1^{\circ}\text{C}$  and 12 h light-dark cycle, lights on at 6:00 AM, lights off at 6:00 PM).

### 85 *Animal preparation*

86 For the VNS-fMRI experiments, each animal was initially anesthetized with 5% isoflurane and  
87 maintained with continuous administration of 2-3% isoflurane mixed with oxygen and a bolus of analgesic  
88 (Rimadyl, 5 mg/Kg, Zoetis) administered subcutaneously. After a toe-pinch check for adequate anesthesia,  
89 a 2-3cm midline incision was made starting at the jawline and moving caudally. The left cervical vagus  
90 nerve was exposed and isolated after removing the surrounding tissue. A bipolar cuff electrode  
91 (Microprobes, made of platinum and with 1mm between contacts) was wrapped around the exposed vagus  
92 nerve. For resting-state fMRI experiments, animals were anesthetized with the same dose of anesthesia  
93 without the surgical procedures.

94 After the acute electrode implantation (for VNS-fMRI) or the initial anesthetization (for resting-  
95 state fMRI), each animal was moved to the small-animal horizontal MRI system (BioSpec 70/30, Bruker).  
96 The animal's head was constrained with a customized head restrainer. A bolus of dexdomitor (Zoetis, 7.5  
97  $\mu\text{g}/\text{Kg}$  for animals gone through electrode implantation, 15  $\mu\text{g}/\text{Kg}$  for animals without surgery) was  
98 administered subcutaneously. About 15-20 mins after the bolus injection, dexdomitor was continuously  
99 and subcutaneously infused at 15  $\mu\text{g}/\text{Kg}/\text{h}$ ; the dose was increased every hour as needed (31). In the  
100 meanwhile, isoflurane was administered through a nose cone, with a reduced concentration of 0.1-0.5% mixed  
101 with oxygen. Throughout the experiment, both the dexdomitor infusion rate and the isoflurane dose were

102 adjusted to maintain a stable physiological condition with the respiration rate between 40 and 70 times per  
103 min and the heart rate between 250 and 350 beats per min. The heart and respiration rates were monitored  
104 by using a small-animal physiological monitoring system (Kent Scientific). The animal's body temperature  
105 was maintained at  $37 \pm 0.5$  °C using an animal-heating system. The oxygen saturation level (SpO<sub>2</sub>) was  
106 maintained above 96%.

107

### 108 *Vagus nerve stimulation*

109 The bipolar cuff electrode was connected to a current stimulator (model 2200, A-M system) placed  
110 outside of the MRI room through a twisted-pair of copper wire. Stimulation current was delivered in 10s-  
111 ON-50s-OFF cycles. When it was ON, biphasic square pulses (width: 0.1 ms; amplitude: 1.0 mA; frequency:  
112 10 Hz) were delivered. Each fMRI session included ten ON/OFF cycles. A resting (stimulation-free) period  
113 of at least one minute was given between sessions. Up to 4 sessions were scanned for each animal. Fig 1  
114 illustrates the VNS paradigm.

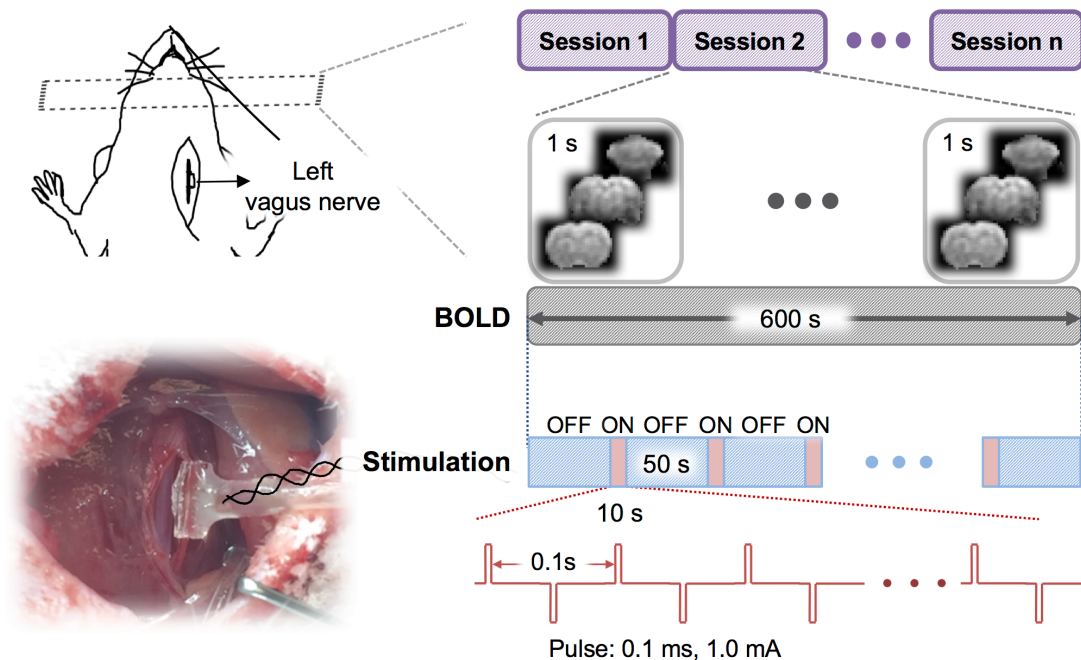

115

116 **Fig 1. Experimental design for fMRI during VNS.** Each rat was stimulated at the left cervical vagus  
117 through a cuff electrode implanted in an acute surgery. Biphasic current pulses were delivered during a  
118 10s “ON” period alternating with a 50s “OFF” period for 10 cycles. With this block design, the rat was  
119 scanned for fMRI with a repetition time of 1s.

## 120 ***MRI and fMRI***

121 MRI data were acquired with a 7-T small-animal MRI system (BioSpec 70/30, Bruker) equipped  
122 with a volume transmitter coil (86 mm inner diameter) and a 4-channel surface receiver array. After the  
123 localizer scans, T<sub>2</sub>-weighted anatomical images were acquired with a rapid acquisition with relaxation  
124 enhancement (RARE) sequence (repetition time (TR)=5804.607s, effective echo time (TE)=32.5ms, echo  
125 spacing=10.83 ms, voxel size=0.125×0.125×0.5mm<sup>3</sup>, RARE factor=8, flip angle (FA)=90°). The BOLD-  
126 fMRI data were acquired by using a 2-D single-shot gradient echo echo-planar imaging (EPI) sequence  
127 (TR=1 s, TE=15 ms, FA=55°, in-plane resolution about 0.6×0.6 mm<sup>2</sup>, slice thickness=1 mm).

## 128 ***Data preprocessing***

129 MRI and fMRI data were preprocessed by using Analysis of Functional Neuroimages (AFNI) and  
130 custom-built functions in MATLAB. Within each session, the fMRI data were corrected for motion by  
131 registering every volume to the first volume using *3dvolreg*. After removing the first ten volumes, *retroicor*  
132 was used to correct for the motion artifacts due to respiratory and cardiac activity (32, 33). Then, *slicetimer*  
133 was used to correct the timing for each slice. For each animal, we first registered the EPI image to its T<sub>2</sub>  
134 weighted structural images and then normalized to a volumetric template (34) using *flirt*. Motion artifacts  
135 were further corrected by regressing out the six motion-correction parameters. The fMRI data were then  
136 spatially smoothed with a 3-D Gaussian kernel with a 0.5-mm full width at half maximum (FWHM). The  
137 fMRI time series were detrended by regressing out a 2<sup>nd</sup>-order polynomial function voxel by voxel.

## 138 ***General linear model analysis***

139 We used the conventional general linear model (GLM) analysis to map the activations evoked by  
140 VNS as in previous studies (23, 24, 35-37). Specifically, we derived a response model by convolving the  
141 stimulation block (modeled as a box-car function) with a canonical hemodynamic response function (HRF)  
142 (modeled as a gamma function). For each session, the fMRI signal at every voxel was correlated with this  
143 response model. The correlation coefficient was converted to a z-score by using the Fisher's z-transform.  
144 The voxel-wise z-score was averaged across sessions and animals, and the average z-score was evaluated  
145 for statistical significance with a one-sample t-test ( $p < 0.05$ , uncorrected).

146 This analysis revealed the group-level activation map with VNS given an assumed response model.  
147 Since the validity of this response model for VNS was not established, we intentionally varied the response  
148 model by assuming three different values (3s, 6s, or 9s) for the peak latency of the HRF. We compared the  
149 activation maps obtained with the three different response models, to qualitatively assess the dependence  
150 of the model-based activation mapping on the presumed response characteristics.

## 151 ***Independent component analysis***

152 In contrast to the voxel-wise GLM analysis, we used ICA to map networks and their responses to  
153 VNS in a data-driven or model-free manner. For each session and each voxel, the fMRI signal during VNS  
154 was demeaned and divided by its standard deviation. The resulting fMRI data were then concatenated across  
155 all VNS-fMRI sessions. Infomax ICA (38) was used to decompose the concatenated data into 20 spatially  
156 independent components (ICs). Each of these ICs included a spatial map and a time series, representing a  
157 brain network and its temporal dynamics, respectively. In the spatial maps of individual ICs, the intensities  
158 at each given voxel represented the weights by which the time series of corresponding ICs were combined  
159 to explain this voxel's fMRI time series. The polarity of each IC was determined to ensure the positive  
160 skewness of its weight distribution. Such weights were converted to Z-statistics and then thresholded as  
161 described in a previous paper (39). The threshold was selected such that the false negative rate was three  
162 times as large as the false positive rate. To obtain the false negative and positive rates, the Z-statistics of all



163 voxels in an IC map were modeled as a two-Gaussian mixture distributions: one representing the noise, the  
164 other representing the signal.

165 Following ICA, we evaluated the VNS-evoked response separately for each IC, instead of each  
166 voxel. To do so, each IC's time series was segmented according to the timing of every VNS block. Each  
167 segment lasted 54 seconds, starting from 3 seconds before the onset of a VNS block to 41 seconds after the  
168 offset of this block, while the stimulus block lasted 10 seconds. To address whether an IC responded to the  
169 VNS, we treated each time point as a random variable and each segment as an independent sample. One-  
170 way analysis of variance (ANOVA) was conducted against a null hypothesis that there was no difference  
171 among all the time points (meaning no response). The ICs that were statistically significant ( $p < 5e-6$ ) were  
172 considered as activated by VNS.

173 For each activated IC, we further characterized its temporal response to VNS. Briefly, we identified  
174 the time points during or after the VNS block, where the signals significantly differed from the pre-stimulus  
175 baseline by using the Tukey's honest significant difference (HSD) test as a post-hoc analysis following the  
176 previous ANOVA test. Following this statistical test, the VNS-activated ICs were visually classified into  
177 three types (i.e. positive, negative, and mixed) of responses.

### 178 ***Functional connectivity analysis***

179 We further addressed whether VNS altered the patterns of temporal interactions among functional  
180 networks identified by ICA. To do so, the voxel time series was demeaned and standardized for each fMRI  
181 session including both VNS and resting conditions. The fMRI data were concatenated across all sessions  
182 and were then decomposed by ICA to yield 20 spatially ICs or networks, along with their corresponding  
183 time series. The first IC was removed because it was identified as the global component. The time series of  
184 the rest ICs were divided into the signals corresponding to the VNS sessions versus those corresponding to  
185 the resting-state sessions.

186 We defined the functional connectivity between networks as the temporal correlations between the  
187 ICs. The correlations were evaluated separately for the resting and VNS conditions and for every pair of  
188 ICs. Based on their temporal correlations, we grouped the ICs into clusters by applying k-means clustering  
189 method to ICs' temporal correlation matrix. As a result, the correlations tended to be stronger within clusters  
190 than between clusters.

191 We further evaluated the differences in functional connectivity between the VNS condition and the  
192 resting state. For this purpose, the functional connectivity between ICs was evaluated for each VNS session,  
193 as well as each resting-state session. Their differences between these two conditions were evaluated using  
194 unpaired two-sample t-test ( $p < 0.05$ , uncorrected). The changes in functional connectivity were displayed  
195 in the functional connectogram (40).

196

## 197 **Results**

### 198 ***Model-based VNS activations were sensitive to variation of the response model***

199 Seven rats were scanned for fMRI while their left cervical vagus nerve was electrically stimulated  
200 in a (10s-ON-50s-OFF) block-design paradigm as illustrated in Fig 1. The BOLD response phase-locked  
201 to the VNS block appeared complex and variable across regions of interest (ROIs). For example, the BOLD  
202 responses were notably different across three ROIs, namely the retrosplenial cortex (RSC), brainstem (BS),  
203 and dorsal caudate putamen (Cpu) in a functional atlas (41) of the rat brain (Fig 2A). These responses were  
204 not readily explainable by a typical response model derived from a canonical HRF (Fig 2B, top). The GLM  
205 analysis with three different response models (by varying the HRF peak latency with 3s increments) yielded  
206 almost entirely distinctive activation maps (Fig 2B), each of which was only marginally significant ( $p < 0.05$ ,  
207 uncorrected). Therefore, VNS-evoked BOLD responses were too complex and variable to be captured by a  
208 single response model. The GLM analysis likely leads to incomplete and inconsistent activations with VNS,  
209 which possibly accounts for the diverging findings reported in the related literature (20-24).

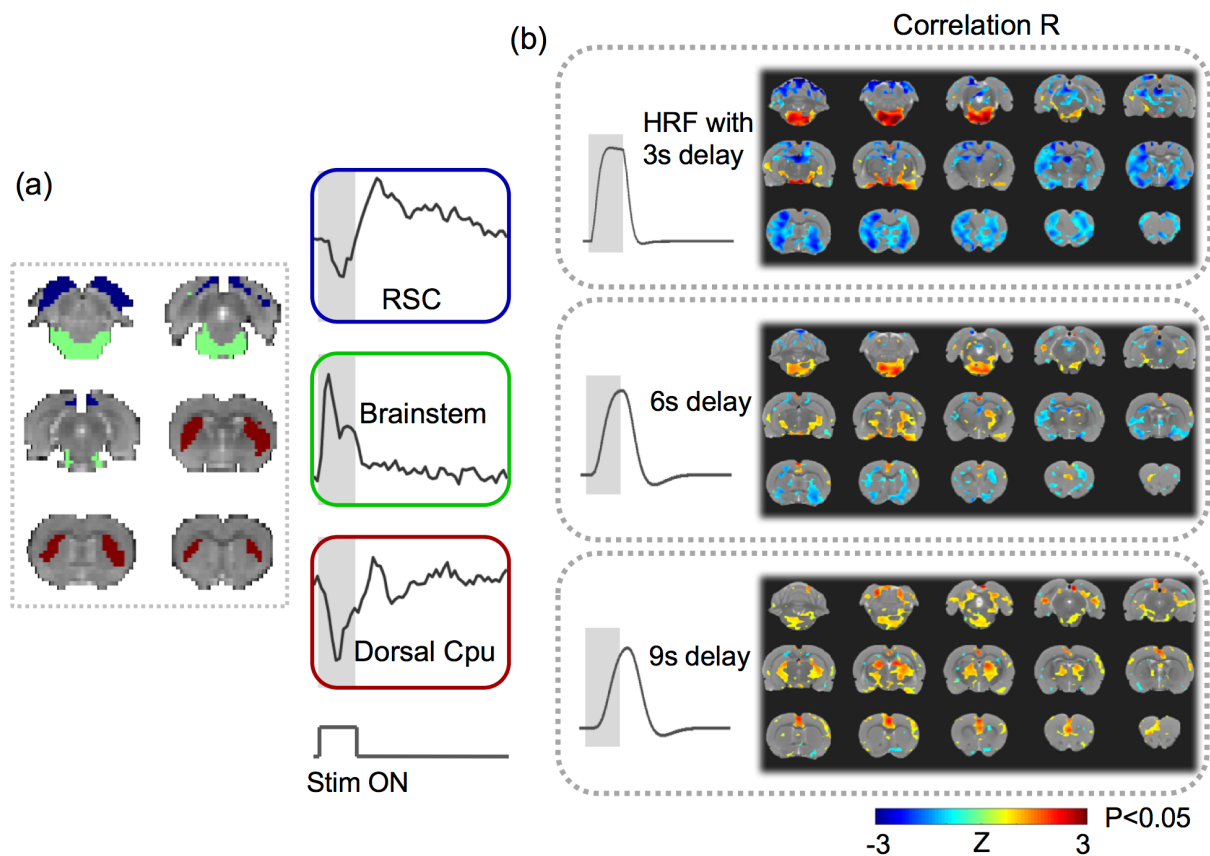

210

211 **Fig 2. VNS-evoked responses varied across regions.** (A) shows the response time series averaged within  
212 each of the three regions of interest: the retrosplenial cortex (RSC) (blue), the brainstem (green), and the  
213 dorsal caudate putamen (Cpu) (red). (B) shows the highly different activation maps based on the response  
214 models derived with the HRF, for which the peak latency was assumed to be 3s, 6s, or 9s. The color shows  
215 the group average of the z-transformed correlation between the voxel time series and the modeled response.  
216 The maps were thresholded with  $p < 0.05$  (one-sample t-test, uncorrected).

### 217 *VNS induced widespread and complex network responses*

218 With a data-driven method, we evaluated the VNS-evoked responses in the level of networks,  
219 where the networks were identified as spatially ICs. It turned out that 15 out of the 20 ICs were significantly  
220 activated by VNS (one-way ANOVA,  $p < 5e-6$ , Fig 3A). Those activated ICs collectively covered 76.03%

221 of the brain volume (Fig 3B). Among the activated regions, the brainstem and the hypothalamus exhibited  
222 relatively stronger responses than other areas.

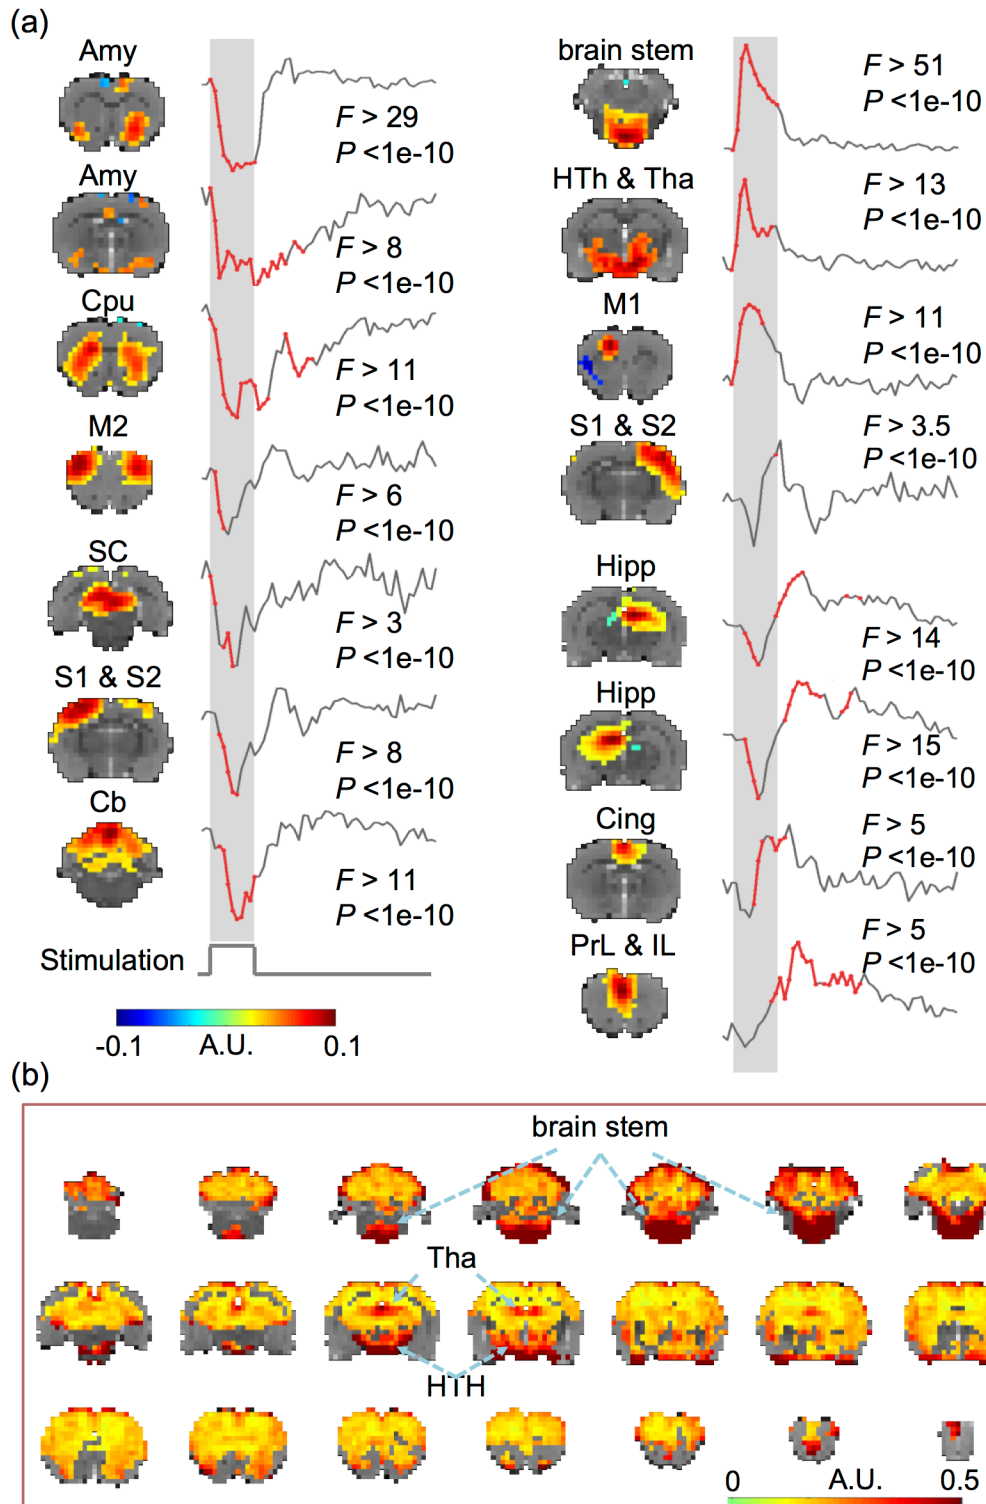

223

224 **Fig 3. VNS evoked widespread and complex responses in the brain.** (A) VNS-evoked responses for  
225 different brain networks derived with ICA. The ICA-defined networks are labeled as: amygdala (Amy),  
226 caudate putamen (Cpu), hippocampus, (Hipp), cingulate cortex (Cing), prelimbic cortex (PrL), infralimbic  
227 cortex (IL), brain stem, hypothalamus (HTh), thalamus (Tha), superior colliculus (SC), cerebellum (Cb),  
228 primary and secondary motor cortex (M1, M2), and primary and secondary somatosensory cortex (S1,  
229 S2). For each network, the time points at which the responses were significant are shown in red. (B) The  
230 VNS-activated voxels cover 76.03% of the brain volume. The color represents the standard deviation of  
231 the voxel-wise response averaged across repetitions of VNS. The locations with the greatest responses are  
232 highlighted with arrows. Data relevant to the VNS-evoked network responses are available in the online  
233 Supplementary Information.

234 The response time courses were also notably different across ICs. Fig 3A also highlights in red the  
235 time points, where the post-stimulus responses were significantly different from the pre-stimulus baseline  
236 ( $p < 0.05$ , Tukey's HSD). It was noticeable that different ICs were activated at different times following VNS.  
237 The response time courses also showed different polarities and shapes, and could be generally classified as  
238 the positive, negative, or biphasic-mixed response. The negative response was shown in the amygdala,  
239 dorsal striatum, primary motor cortex, midbrain, left somatosensory cortex, and superior cerebellum. The  
240 positive response was shown mainly in the brainstem, thalamus, and hypothalamus. The mixed response  
241 was shown in the hippocampal formation, cingulate cortex, and prelimbic & infralimbic cortex. The ICs  
242 that appeared to exhibit similar responses to VNS were presumably more functionally associated with one  
243 another. From a different perspective, the network-wise response to VNS also seemed to be either stimulus-  
244 locked or long-lasting (i.e. sustained even 20-30 s after the end of VNS). The stimulus-locked response was  
245 most notable in the brainstem and hypothalamus, which receives more direct vagal projections with fewer  
246 synapses. The long-lasting response was shown in the hippocampal formation, prefrontal cortex, amygdala,  
247 all of which were presumably related to high-level cognitive functions, such as memory formation, decision

248 making, and emotion regulation. Speculatively, the former was the direct effect of VNS; the latter was the  
249 secondary effect.

### 250 ***VNS altered functional connectivity***

251 We further evaluated the network-network interactions during VNS in comparison with those in  
252 the resting state. The networks were captured as the ICs obtained by applying ICA to the data in both VNS  
253 and resting conditions. The matrix of pair-wise (IC-IC) correlations during VNS was overall similar to that  
254 in the resting state (Fig 4A). However, their differences in functional connectivity reorganized the clustering  
255 of individual networks (into Group 1, 2, 3) (Fig 4A). Group 1 covered the sensorimotor cortex, and it was  
256 mostly consistent between the VNS and resting conditions. Relative to the resting state, VNS reduced the  
257 extent of networks for Group 2, but increased the extent of networks for Group 3. For a closer investigation  
258 of the network reorganization, we found that VNS strengthened the correlations between the hippocampal  
259 formation and the retrosplenial cortex relative, but weakened the correlations between the prefrontal cortex  
260 and the basal ganglia. Beyond the difference in clustering, the significant changes in functional connectivity  
261 ( $P < 0.005$ ,  $t$ -test) are all shown in Fig 4B. The most notable changes were all related to the limbic system.  
262 During VNS, the cingulate cortex was less correlated with the ventral striatum; the hippocampal formation  
263 formed stronger functional connectivity between its left and right components, and with the retrosplenial  
264 cortex. The reorganization of functional connectivity was not only confined to the regions within the limbic  
265 system, but also between the limbic system and the sensorimotor cortex. VNS strengthened the interaction  
266 across the sensorimotor cortex with the hippocampal formation, retrosplenial cortex, and dorsal striatum,  
267 whereas it weakened the functional connectivity between the sensorimotor cortex and the cingulate cortex.  
268 In short, VNS reorganized the functional connectivity within the limbic system and altered the interactions  
269 between the limbic system and the sensorimotor cortex.

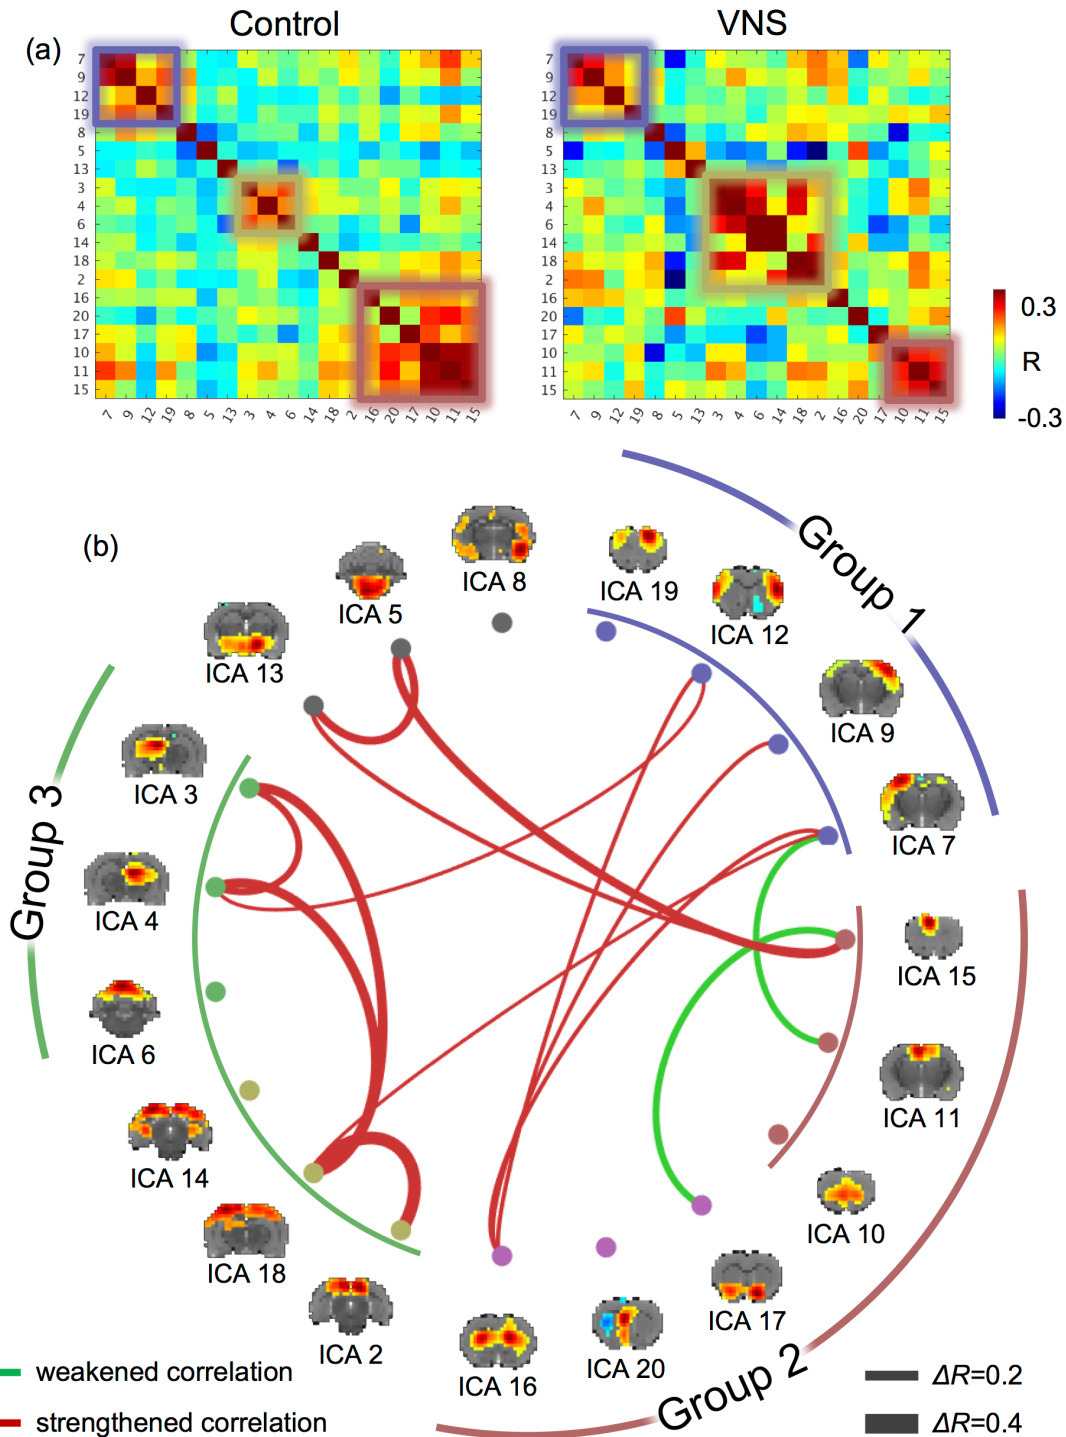

270

271 **Fig 4. VNS altered the functional connectivity among functional networks.** (A) shows the correlations  
272 between independent components. The left shows the correlation matrix during the resting state, or the  
273 “control” condition. The right shows the correlation matrix during VNS, or the “VNS” condition. Smaller

274 squares highlight the networks (or ICs) that were clustered into groups (based on k-means clustering). (B)  
275 shows the IC-IC functional connectivity that was significantly different between the VNS and control  
276 conditions (t-test,  $P < 0.005$ ). Red lines represent increases in functional connectivity, and green lines  
277 represent decreases in functional connectivity. The thickness of the lines represents the (VNS minus  
278 control) change in correlation. The brain maps show the spatial patterns of individual ICs. Corresponding  
279 to the squares in (A), the arc lines illustrate how the ICs were clusters into groups, for the VNS condition  
280 (inner circle) and the control condition (outer circle).

281

## 282 **Discussion**

283 Here, we report a model-free analysis method for mapping and characterizing the BOLD  
284 activations with VNS. Findings obtained with this method suggest that the repetitive and block-wise  
285 stimulation to the left cervical vagus nerve induces activations at widespread brain regions. The responses  
286 are complex and variable across regions, much beyond what can be described with conventionally assumed  
287 HRF. In addition, VNS also alters functional connectivity among different brain networks, and changes the  
288 brain's functional organization from its intrinsic mode as observed in the resting state. These findings  
289 suggest widespread and profound effects of VNS on the brain's regional activity and inter-regional  
290 interaction. Such effects are likely under-estimated by the model-based analysis in prior studies. This study  
291 also highlights the value of fMRI for addressing the large-scale and brain-wide effects of VNS, in order to  
292 understand and optimize its potential use for treatment of disease conditions in the brain or other organs,  
293 e.g. the gastrointestinal system.

### 294 ***VNS evoke brain-wide responses***

295 A major finding in this study was that VNS evoked time-locked and widespread BOLD responses  
296 over most parts of the brain. This finding appeared surprising at the first glance, since the stimulation was



297 applied to the left cervical vagus – a seemingly narrowly-focused entry of neuromodulation. Nevertheless,  
298 previous studies suggest that neural activity may drive global fluctuations in resting-state fMRI activity  
299 (42), and even simple (e.g., checkerboard) visual stimulation may evoke whole-brain fMRI responses (43).  
300 Common to those prior studies and this study is the notion that the brain is so densely wired and  
301 interconnected that focal modulation may induce a cascade of responses through neuronal circuits. Such  
302 network responses may even have a global reach, if the stimulation innervates sub-cortical structures with  
303 distributed modulatory effects on the brain (44).

304 In this regard, widespread responses to VNS may be mediated through the diffusive  
305 neuromodulation triggered by VNS. Vagal afferents project to the parabrachial nucleus, locus coeruleus,  
306 raphe nuclei through the nucleus of solitary tract (45). From the parabrachial nucleus, locus coeruleus, and  
307 raphe nuclei, connectivity extends onto the hypothalamus, thalamus, amygdala, anterior insular, infralimbic  
308 cortex, and lateral prefrontal cortex (46-49). In fact, the widespread VNS-evoked activations reported  
309 herein are consistent with the full picture gathered from piecemeal activations observed in prior VNS-fMRI  
310 (see reviews in (25)), transcutaneous VNS-fMRI (50), and EEG-fMRI studies (13, 14). In light of those  
311 results, the extent of the VNS effects on the brain has been under-estimated in prior studies, likely due to  
312 the use of simplified response models that fail to capture the complex and variable responses across all  
313 activated regions.

### 314 *Origins and interpretation of different response characteristics*

315 Results in this study suggest that VNS induces a variety of BOLD responses that vary across regions.  
316 In addition to coarse and qualitative classification of various responses as positive, negative, or mixed (first  
317 negative and then positive) (Fig 3), the responses at various regions or networks also differed in terms of  
318 transient vs. sustained behaviors during and following VNS. For example, the responses at the brainstem  
319 and the hypothalamus showed a very rapid rise around 2s and rapid decay around 5s following the onset of  
320 VNS. Although the generalizable origins of transient BOLD responses are still debatable (51-53), we  
321 interpret the transient responses to VNS as a result of direct neuroelectric signaling through the vagal nerves.

322 Nuclei in the brainstem, e.g., NTS, contain neurons receiving direct projections from the vagus, and in turn  
323 connect to the hypothalamus. Such brain structures are thus well-positioned to respond rapidly to VNS.  
324 Also, the rapid decay of the BOLD response in the brainstem and hypothalamus may indicate neuronal  
325 adaption – a factor of consideration for designing the duration and duty cycle of VNS. However, such  
326 interpretation should be taken with caution. The neurovascular coupling (modeled as the HRF) behaves as  
327 a low-pass filter through which the BOLD response is generated from local neuronal responses. Although  
328 the peak latency in HRF is 4 to 6s in humans, it is as short as 2s in rodents (54), making it relatively more  
329 suitable for tracking transient neuronal dynamics.

330 Another intriguing observation was the prolonged BOLD responses that sustained for a long period  
331 following the offset of VNS. In the striatum, hippocampus, as well as the prelimbic and infralimbic cortex,  
332 the VNS-evoked response lasted for 40s or even longer, while the VNS only lasted 10s (Fig 3). Such  
333 prolonged responses suggest potentially long-lasting effects of VNS. This observation is also in line with  
334 clinical studies showing that the effects of VNS on seizure suppression are not limited to the stimulation,  
335 but sustain during periods in the absence of VNS (55). Moreover, those regions showing prolonged effects  
336 of VNS tended to be higher-level functional areas presumably involved in learning, decision-making,  
337 memory, and emotion-processing. Speculatively, it implies that the VNS-based modulation of cognitive  
338 functions or dysfunctions operates in a relatively longer time scale while imposing potentially therapeutic  
339 effects on a longer term.

#### 340 ***VNS alters network-network interactions***

341 This study highlights the importance of evaluating the effects of VNS on functional connectivity,  
342 which measures the degree to which regions or networks interact with each other. It is widely recognized  
343 that brain functions emerge from coordination among regions (56). However, prior studies address the  
344 effects of VNS in focal and target regions (57), whereas the effects of VNS on functional connectivity is  
345 perhaps more functionally relevant. In line with this perspective, a recent study has shown that  
346 transcutaneous VNS modulates the functional connectivity in the default mode network in patients with

347 major depressive disorders, and the change in functional connectivity is related to the therapeutic efficacy  
348 across individual patients [50]. Thus, VNS may reorganize the patterns of interactions among functional  
349 networks – a plausible network basis underlying VNS-based therapeutics.

350 Our results show that VNS reorganizes the functional connectivity with respect to the limbic system.  
351 Relative to the intrinsic functional connectivity in the resting state, VNS increases functional connectivity  
352 between the retrosplenial cortex and hippocampal formation, of which the functional roles are presumably  
353 related to memory, learning, and monitoring sensory inputs (58, 59). In addition, VNS increases functional  
354 connectivity between the sensory cortex and the striatum, of which the functional roles are presumably the  
355 integration of sensorimotor, cognitive, and motivation/emotion (60). In contrast, VNS decreases functional  
356 connectivity between the cingulate cortex and the ventral striatum, which likely affect the emotional control  
357 of visceral, skeletal, and endocrine outflow (61). Collectively, these observations lead us to speculate that  
358 VNS biases the limbic system to shift its functional role from emotional processing to perceptual learning.  
359 Such speculation is consistent with the therapeutic effects of VNS in depression patients (62, 63) and the  
360 cortical plasticity of interest to perceptual learning and motor rehabilitation induced by VNS (64, 65).

### 361 ***Model-free activation mapping in the level of networks***

362 Central to this study is the use of model-free and data-driven analysis for mapping activations in  
363 the level of networks, instead of voxels or regions. This is in contrast to conventional GLM analysis used  
364 in previous VNS-fMRI studies, which assumes that neural responses sustain in the entire period of VNS,  
365 and the BOLD effects of neural responses may be modeled with a canonical HRF (23, 24, 35-37). Both of  
366 these assumptions may not be entirely valid. Neural responses may exhibit a range of non-linear  
367 characteristics. The typical HRF model is mostly based on data or findings obtained from the cortex during  
368 sensory stimulation (66), whereas no study has modeled the HRF for VNS. Moreover, the neurovascular  
369 coupling may also vary across regions in the brain, especially between sub-cortical and cortical areas due  
370 to their differences in local vasculatures (67). Thus, the GLM analysis with a single and empirical response  
371 model most likely falls short for explaining the complex and variable responses across all brain regions.

372           The model-free analysis allowed us to detect the VNS-evoked brain response in a data-driven way  
373 without assuming any prior response model. A similar strategy has been used to test for voxel-wise BOLD  
374 responses to visual stimulation in humans (43). What was perhaps unique in this study was the use of the  
375 model-free analysis on the activity of spatially independent components, rather than that of single voxels.  
376 Each IC contained a set of voxels (or locations) that shared a common pattern of temporal dynamics. ICA  
377 utilized the fact that individual voxels were organized by networks, not in isolation, to extract the network  
378 activity as the time series of each IC, which reflected the (weighted) average activity of all the voxels that  
379 belonged to each IC. As such, the signal-to-noise ratio was higher for IC-wise activity than for voxel-wise  
380 activity, providing better sensitivity for detecting activations at the network level. This model-free analysis  
381 method is thus arguably more favorable than conventional GLM analysis, especially when the response  
382 characteristics are complex and unclear, e.g., given VNS.

### 383 ***Potentially confounding cardiac and respiratory effects***

384           The BOLD signal is an indirect measure of neural activity. Therefore, it may be affected by non-  
385 neuronal physiological fluctuations (68). Previous studies have shown that VNS causes cardiorespiratory  
386 effects, e.g., variations in the heart rate, respiration rate, and SpO<sub>2</sub> (69, 70). Such effects may potentially  
387 confound the interpretation of the VNS-induced BOLD responses regarding neuronal activations. Such  
388 confounding effects were highlighted in a prior study, in which VNS was found to decrease the heart rate  
389 and in turn decrease the BOLD signal throughout the rat brain (71). In this study, we were concerned about  
390 this potential confounding effect, and reduced to the pulse width of VNS to 0.1ms, instead of 0.5ms in that  
391 study (71). Such shortened pulse width largely mitigated the cardiac effects, as no obvious changes in heart  
392 rate were noticeable during experiments.

393           Also, the cardiac effects would manifest themselves as the common physiological response  
394 observable throughout the brain. This was not the case in this study. Despite wide-spread activations with  
395 VNS, the responses at individual regions exhibited different temporal characteristics, which could not be  
396 readily explained by a common confounding source (e.g., respiratory or cardiac). Instead, the regions with

397 similar response patterns formed well-patterned functional networks, resembling intrinsic resting-state  
398 networks previously observed in rats (72). For these reasons, it was unlikely that the VNS-induced  
399 activation and functional-connectivity patterns were the result of non-neuronal cardiac or respiratory effects.  
400 Similar justifications are also applicable to the confounding respiratory effects. Nevertheless, future studies  
401 are desirable to fully disentangle the neuronal vs. non-neuronal effects of VNS. Of particular interest is  
402 using multi-echo fMRI to differentiate BOLD vs. non-BOLD effects (68), and combining electrophysiology  
403 and fMRI to pinpoint the neural origin of the fMRI response to VNS (73).

## 404 Acknowledgements

405 The authors thank Elizabeth Baronowsky and Dr. Matthew Ward for their initial assistance in animal  
406 surgery. This work is supported by the National Institutes of Health [OT2TR001965, R01MH104402].

## 407 Supplementary Information

408 ICA-derived network responses to VNS, including the spatial patterns of the networks, and their  
409 corresponding response time courses.

## 410 References

- 411 1. Gaskell WH. The Electrical changes in the Quiescent Cardiac Muscle which accompany  
412 Stimulation of the Vagus Nerve. *J Physiol.* 1886;7(5-6):451-2.
- 413 2. Robinson C, Draper G. Studies with the electrocardiograph on the action of the vagus nerve on  
414 the human heart : II. the effects of vagus stimulation on the hearts of children with chronic valvular  
415 disease. *J Exp Med.* 1912;15(1):14-48.
- 416 3. Ben-Menachem E. Vagus-nerve stimulation for the treatment of epilepsy. *Lancet Neurol.*  
417 2002;1(8):477-82.
- 418 4. George MS, Sackeim HA, Rush AJ, Marangell LB, Nahas Z, Husain MM, et al. Vagus nerve  
419 stimulation: a new tool for brain research and therapy. *Biol Psychiatry.* 2000;47(4):287-95.
- 420 5. De Ridder D, Vanneste S, Engineer ND, Kilgard MP. Safety and efficacy of vagus nerve  
421 stimulation paired with tones for the treatment of tinnitus: a case series. *Neuromodulation.*  
422 2014;17(2):170-9.
- 423 6. Peña DF, Engineer ND, McIntyre CK. Rapid remission of conditioned fear expression with  
424 extinction training paired with vagus nerve stimulation. *Biol Psychiatry.* 2013;73(11):1071-7.

- 425 7. Sjögren MJ, Hellström PT, Jonsson MA, Rannerstam M, Silander HC, Ben-Menachem E.  
426 Cognition-enhancing effect of vagus nerve stimulation in patients with Alzheimer's disease: a pilot study.  
427 *J Clin Psychiatry*. 2002;63(11):972-80.
- 428 8. Bodenlos JS, Kose S, Borckardt JJ, Nahas Z, Shaw D, O'Neil PM, et al. Vagus nerve stimulation  
429 acutely alters food craving in adults with depression. *Appetite*. 2007;48(2):145-53.
- 430 9. Henry TR. Therapeutic mechanisms of vagus nerve stimulation. *Neurology*. 2002;59(6 suppl  
431 4):S3-S14.
- 432 10. Beaumont E, Campbell RBP, Andresen MC, Scofield SL, Singh K, Libbus I, et al. Clinically-styled  
433 vagus nerve stimulation augments spontaneous discharge in second and higher order sensory neurons  
434 in rat nucleus of the solitary tract. *American Journal of Physiology-Heart and Circulatory Physiology*.  
435 2017;ajpheart. 00070.2017.
- 436 11. Groves DA, Bowman EM, Brown VJ. Recordings from the rat locus coeruleus during acute vagal  
437 nerve stimulation in the anaesthetised rat. *Neuroscience letters*. 2005;379(3):174-9.
- 438 12. Larsen LE, Wadman WJ, Marinazzo D, van Mierlo P, Delbeke J, Daelemans S, et al. Vagus nerve  
439 stimulation applied with a rapid cycle has more profound influence on hippocampal electrophysiology  
440 than a standard cycle. *Neurotherapeutics*. 2016;13(3):592-602.
- 441 13. Chase MH, Nakamura Y, Clemente CD, Sterman MB. Afferent vagal stimulation: neurographic  
442 correlates of induced EEG synchronization and desynchronization. *Brain Res*. 1967;5(2):236-49.
- 443 14. Bartolomei F, Bonini F, Vidal E, Trébuchon A, Lagarde S, Lambert I, et al. How does vagal nerve  
444 stimulation (VNS) change EEG brain functional connectivity? *Epilepsy Res*. 2016;126:141-6.
- 445 15. Ressler KJ, Mayberg HS. Targeting abnormal neural circuits in mood and anxiety disorders: from  
446 the laboratory to the clinic. *Nature neuroscience*. 2007;10(9):1116.
- 447 16. Garnett ES, Nahmias C, Scheffel A, Firnau G, Upton AR. Regional cerebral blood flow in man  
448 manipulated by direct vagal stimulation. *Pacing Clin Electrophysiol*. 1992;15(10 Pt 2):1579-80.
- 449 17. Ko D, Heck C, Grafton S, Apuzzo ML, Couldwell WT, Chen T, et al. Vagus nerve stimulation  
450 activates central nervous system structures in epileptic patients during PET H<sub>2</sub>(15)O blood flow imaging.  
451 *Neurosurgery*. 1996;39(2):426-30; discussion 30-1.
- 452 18. Henry TR, Votaw JR, Pennell PB, Epstein CM, Bakay RA, Faber TL, et al. Acute blood flow changes  
453 and efficacy of vagus nerve stimulation in partial epilepsy. *Neurology*. 1999;52(6):1166-73.
- 454 19. Zobel A, Joe A, Freymann N, Clusmann H, Schramm J, Reinhardt M, et al. Changes in regional  
455 cerebral blood flow by therapeutic vagus nerve stimulation in depression: an exploratory approach.  
456 *Psychiatry Res*. 2005;139(3):165-79.
- 457 20. Devous M, Husain M, Harris T, Rush A. Effects of VNS on regional cerebral blood flow in  
458 depressed subjects. *European Psychiatry*. 2002;17:113-4.
- 459 21. Sucholeiki R, Alsaadi TM, Morris lii GL, Ulmer JL, Biswal B, Mueller WM. fMRI in patients  
460 implanted with a vagal nerve stimulator. *Seizure*. 2002;11(3):157-62.
- 461 22. Liu W-C, Mosier K, Kalnin A, Marks D. Vagus Nerve Stimulation in patients: a BOLD fMRI study.  
462 *NeuroImage*. 2001;13(6):810.
- 463 23. Bohning DE, Lomarev MP, Denslow S, Nahas Z, Shastri A, George MS. Feasibility of vagus nerve  
464 stimulation—synchronized blood oxygenation level—dependent functional MRI. *Investigative Radiology*.  
465 2001;36(8):470-9.
- 466 24. Lomarev M, Denslow S, Nahas Z, Chae JH, George MS, Bohning DE. Vagus nerve stimulation  
467 (VNS) synchronized BOLD fMRI suggests that VNS in depressed adults has frequency/dose dependent  
468 effects. *J Psychiatr Res*. 2002;36(4):219-27.
- 469 25. Chae JH, Nahas Z, Lomarev M, Denslow S, Lorberbaum JP, Bohning DE, et al. A review of  
470 functional neuroimaging studies of vagus nerve stimulation (VNS). *J Psychiatr Res*. 2003;37(6):443-55.
- 471 26. Krahl SE, Clark KB, Smith DC, Browning RA. Locus coeruleus lesions suppress the seizure-  
472 attenuating effects of vagus nerve stimulation. *Epilepsia*. 1998;39(7):709-14.

- 473 27. Nichols JA, Nichols AR, Smirnakis SM, Engineer ND, Kilgard MP, Atzori M. Vagus nerve  
474 stimulation modulates cortical synchrony and excitability through the activation of muscarinic receptors.  
475 *Neuroscience*. 2011;189:207-14.
- 476 28. Fang J, Rong P, Hong Y, Fan Y, Liu J, Wang H, et al. Transcutaneous vagus nerve stimulation  
477 modulates default mode network in major depressive disorder. *Biological psychiatry*. 2016;79(4):266-73.
- 478 29. Biswal B, Zerrin Yetkin F, Haughton VM, Hyde JS. Functional connectivity in the motor cortex of  
479 resting human brain using echo-planar mri. *Magnetic resonance in medicine*. 1995;34(4):537-41.
- 480 30. Van Den Heuvel MP, Pol HEH. Exploring the brain network: a review on resting-state fMRI  
481 functional connectivity. *European neuropsychopharmacology*. 2010;20(8):519-34.
- 482 31. Pawela CP, Biswal BB, Hudetz AG, Schulte ML, Li R, Jones SR, et al. A protocol for use of  
483 medetomidine anesthesia in rats for extended studies using task-induced BOLD contrast and resting-  
484 state functional connectivity. *Neuroimage*. 2009;46(4):1137-47.
- 485 32. Glover GH, Li TQ, Ress D. Image-based method for retrospective correction of physiological  
486 motion effects in fMRI: RETROICOR. *Magn Reson Med*. 2000;44(1):162-7.
- 487 33. Birn RM, Diamond JB, Smith MA, Bandettini PA. Separating respiratory-variation-related  
488 fluctuations from neuronal-activity-related fluctuations in fMRI. *Neuroimage*. 2006;31(4):1536-48.
- 489 34. Valdés-Hernández PA, Sumiyoshi A, Nonaka H, Haga R, Aubert-Vásquez E, Ogawa T, et al. An in  
490 vivo MRI template set for morphometry, tissue segmentation, and fMRI localization in rats. *Frontiers in*  
491 *neuroinformatics*. 2011;5.
- 492 35. Nahas Z, Teneback C, Jeong-Ho C, Mu Q, Molnar C, Kozel FA, et al. Serial vagus nerve stimulation  
493 functional MRI in treatment-resistant depression. *Neuropsychopharmacology*. 2007;32(8):1649.
- 494 36. Kraus T, Kiess O, Hösl K, Terekhin P, Kornhuber J, Forster C. CNS BOLD fMRI effects of sham-  
495 controlled transcutaneous electrical nerve stimulation in the left outer auditory canal—a pilot study.  
496 *Brain stimulation*. 2013;6(5):798-804.
- 497 37. Kraus T, Hösl K, Kiess O, Schanze A, Kornhuber J, Forster C. BOLD fMRI deactivation of limbic and  
498 temporal brain structures and mood enhancing effect by transcutaneous vagus nerve stimulation. *J*  
499 *Neural Transm (Vienna)*. 2007;114(11):1485-93.
- 500 38. Bell AJ, Sejnowski TJ. An information-maximization approach to blind separation and blind  
501 deconvolution. *Neural computation*. 1995;7(6):1129-59.
- 502 39. Beckmann CF, Smith SM. Probabilistic independent component analysis for functional magnetic  
503 resonance imaging. *IEEE transactions on medical imaging*. 2004;23(2):137-52.
- 504 40. Irimia A, Chambers MC, Torgerson CM, Van Horn JD. Circular representation of human cortical  
505 networks for subject and population-level connectomic visualization. *Neuroimage*. 2012;60(2):1340-51.
- 506 41. Ma Z, Perez P, Liu Y, Hamilton C, Liang Z, Zhang N. Functional atlas of the awake rat brain: A  
507 neuroimaging study of rat brain specialization and integration. *Neuroimage*. 2016.
- 508 42. Schölvinck ML, Maier A, Frank QY, Duyn JH, Leopold DA. Neural basis of global resting-state fMRI  
509 activity. *Proceedings of the National Academy of Sciences*. 2010;107(22):10238-43.
- 510 43. Gonzalez-Castillo J, Saad ZS, Handwerker DA, Inati SJ, Brenowitz N, Bandettini PA. Whole-brain,  
511 time-locked activation with simple tasks revealed using massive averaging and model-free analysis. *Proc*  
512 *Natl Acad Sci U S A*. 2012;109(14):5487-92.
- 513 44. Lee JH, Durand R, Gradinaru V, Zhang F, Goshen I, Kim D-S, et al. Global and local fMRI signals  
514 driven by neurons defined optogenetically by type and wiring. *Nature*. 2010;465(7299):788.
- 515 45. Paxinos G. *The rat nervous system*: Academic press; 2014.
- 516 46. Van Bockstaele EJ, Peoples J, Valentino RJ. A.E. Bennett Research Award. Anatomic basis for  
517 differential regulation of the rostralateral peri-locus coeruleus region by limbic afferents. *Biol Psychiatry*.  
518 1999;46(10):1352-63.
- 519 47. Dorr AE, Debonnel G. Effect of vagus nerve stimulation on serotonergic and noradrenergic  
520 transmission. *J Pharmacol Exp Ther*. 2006;318(2):890-8.

- 521 48. Manta S, Dong J, Debonnel G, Blier P. Enhancement of the function of rat serotonin and  
522 norepinephrine neurons by sustained vagus nerve stimulation. *J Psychiatry Neurosci*. 2009;34(4):272-80.
- 523 49. Ruffoli R, Giorgi FS, Pizzanelli C, Murri L, Paparelli A, Fornai F. The chemical neuroanatomy of  
524 vagus nerve stimulation. *J Chem Neuroanat*. 2011;42(4):288-96.
- 525 50. Frangos E, Komisaruk BR. Access to vagal projections via cutaneous electrical stimulation of the  
526 neck: fMRI evidence in healthy humans. *Brain stimulation*. 2017;10(1):19-27.
- 527 51. Renvall V, Hari R. Transients may occur in functional magnetic resonance imaging without  
528 physiological basis. *Proc Natl Acad Sci U S A*. 2009;106(48):20510-4.
- 529 52. Tyler CW, Kontsevich LL, Ferree TC. Independent components in stimulus-related BOLD signals  
530 and estimation of the underlying neural responses. *Brain Res*. 2008;1229:72-89.
- 531 53. Obata T, Liu TT, Miller KL, Luh WM, Wong EC, Frank LR, et al. Discrepancies between BOLD and  
532 flow dynamics in primary and supplementary motor areas: application of the balloon model to the  
533 interpretation of BOLD transients. *Neuroimage*. 2004;21(1):144-53.
- 534 54. Ma Y, Shaik MA, Kozberg MG, Kim SH, Portes JP, Timerman D, et al. Resting-state hemodynamics  
535 are spatiotemporally coupled to synchronized and symmetric neural activity in excitatory neurons. *Proc*  
536 *Natl Acad Sci U S A*. 2016;113(52):E8463-E71.
- 537 55. Zabara J. Inhibition of experimental seizures in canines by repetitive vagal stimulation. *Epilepsia*.  
538 1992;33(6):1005-12.
- 539 56. Anastassiou CA, Shai AS. *Psyche, Signals and Systems. Micro-, Meso-and Macro-Dynamics of the*  
540 *Brain*: Springer; 2016. p. 107-56.
- 541 57. Tian P, Teng IC, May LD, Kurz R, Lu K, Scadeng M, et al. Cortical depth-specific microvascular  
542 dilation underlies laminar differences in blood oxygenation level-dependent functional MRI signal.  
543 *Proceedings of the National Academy of Sciences*. 2010;107(34):15246-51.
- 544 58. Bush G, Luu P, Posner MI. Cognitive and emotional influences in anterior cingulate cortex.  
545 *Trends in cognitive sciences*. 2000;4(6):215-22.
- 546 59. Vogt BA, Finch DM, Olson CR. Functional heterogeneity in cingulate cortex: the anterior  
547 executive and posterior evaluative regions. *Cerebral cortex*. 1992;2(6):435-43.
- 548 60. Balleine BW, Delgado MR, Hikosaka O. The role of the dorsal striatum in reward and decision-  
549 making. *Journal of Neuroscience*. 2007;27(31):8161-5.
- 550 61. Parkinson JA, Willoughby PJ, Robbins TW, Everitt BJ. Disconnection of the anterior cingulate  
551 cortex and nucleus accumbens core impairs Pavlovian approach behavior: Further evidence for limbic  
552 cortical-ventral striatopallidal systems. *Behavioral neuroscience*. 2000;114(1):42.
- 553 62. Sackeim HA, Rush AJ, George MS, Marangell LB, Husain MM, Nahas Z, et al. Vagus nerve  
554 stimulation (VNS (TM)) for treatment-resistant depression: efficacy, side effects, and predictors of  
555 outcome. *Neuropsychopharmacology*. 2001;25(5):713.
- 556 63. Nemeroff CB, Mayberg HS, Krahl SE, McNamara J, Frazer A, Henry TR, et al. VNS therapy in  
557 treatment-resistant depression: clinical evidence and putative neurobiological mechanisms.  
558 *Neuropsychopharmacology*. 2006;31(7):1345.
- 559 64. Schwarz LA, Luo L. Organization of the locus coeruleus-norepinephrine system. *Current Biology*.  
560 2015;25(21):R1051-R6.
- 561 65. Mesulam M, Mufson E, Wainer B, Levey A. Central cholinergic pathways in the rat: an overview  
562 based on an alternative nomenclature (Ch1–Ch6). *Neuroscience*. 1983;10(4):1185-201.
- 563 66. Friston KJ, Fletcher P, Josephs O, Holmes A, Rugg M, Turner R. Event-related fMRI: characterizing  
564 differential responses. *Neuroimage*. 1998;7(1):30-40.
- 565 67. Li B, Freeman RD. Neurometabolic coupling in the lateral geniculate nucleus changes with  
566 extended age. *Journal of neurophysiology*. 2010;104(1):414-25.



- 567 68. Kundu P, Brenowitz ND, Voon V, Worbe Y, Vértes PE, Inati SJ, et al. Integrated strategy for  
568 improving functional connectivity mapping using multiecho fMRI. *Proceedings of the National Academy*  
569 *of Sciences*. 2013;110(40):16187-92.
- 570 69. Zaaimi B, Grebe R, Wallois F. Animal model of the short-term cardiorespiratory effects of  
571 intermittent vagus nerve stimulation. *Auton Neurosci*. 2008;143(1-2):20-6.
- 572 70. Murray BJ, Matheson JK, Scammell TE. Effects of vagus nerve stimulation on respiration during  
573 sleep. *Neurology*. 2001;57(8):1523-4.
- 574 71. Reyt S, Picq C, Sinniger V, Clarençon D, Bonaz B, David O. Dynamic Causal Modelling and  
575 physiological confounds: a functional MRI study of vagus nerve stimulation. *Neuroimage*.  
576 2010;52(4):1456-64.
- 577 72. Sierakowiak A, Monnot C, Aski SN, Uppman M, Li T-Q, Damberg P, et al. Default mode network,  
578 motor network, dorsal and ventral basal ganglia networks in the rat brain: comparison to human  
579 networks using resting state-fMRI. *PloS one*. 2015;10(3):e0120345.
- 580 73. Viswanathan A, Freeman RD. Neurometabolic coupling in cerebral cortex reflects synaptic more  
581 than spiking activity. *Nature neuroscience*. 2007;10(10):1308.

582

583
